# Supplementary material
Source: PubMed Central journal article supplement (PMC8209208)
Supplement: 41386_2021_993_MOESM1_ESM.pdf [file 41386_2021_993_MOESM1_ESM.pdf]

## SUPPLEMENTAL MATERIALS

### *Amino acid Beverages*

Amino acid mixtures were prepared by Nutricia (Liverpool, UK). The control beverage consisted of (in g): L-alanine, 4.1; L-arginine, 3.7; L-cysteine, 2.0; L-glycine, 2.4; L-histidine, 2.4; L-isoleucine, 6; L-leucine, 10.1; L-lysine, 6.7; L-methionine, 2.3; L-phenylalanine, 4.3; L-proline, 9.2; L-serine, 5.2; L-threonine, 4.9; L-tryptophan, 3.0; L-tyrosine, 5.2; and L-valine, 6.7. The P/T-depleted beverage had the same composition except that P and T were omitted. Beverages were mixed with cold water and a lemon-lime flavor packet from Nutricia North America (Gaithersburg, MD) in an 11 oz sterile container. Using identical recipes and procedures, we previously reported that 5 hr after drinking the beverage, the P/T depleted beverage reduces the ratio of P/T to the other large neutral amino acids ( $P+T/\sum \text{LNAA}$ ) in plasma by an average of 76% relative to the placebo beverage [1]. Based on PET imaging, this ratio is a measure of the availability of DA the brain [2].

### *Carolina Alcohol Use Patterns Questionnaire (CAUPQ)*

The Carolina Alcohol Use Patterns Questionnaire (CAUPQ, below) assessed adolescent binge drinking before age 18 (question 4) and between 18-21 years (question 5). Responses ranged from “Never” to “More than once a week.” These frequency bins were recoded to estimate the number of binge episodes before age 18 and between 18-21 years (Supplemental Table 1), which were summed to estimate a total number of adolescent (0-21 years) binge episodes.

|                                                                                   |                                             |                                                                                   |                                                     |                                                                                   |                                                                 |                                                                                     |                                                                  |
|-----------------------------------------------------------------------------------|---------------------------------------------|-----------------------------------------------------------------------------------|-----------------------------------------------------|-----------------------------------------------------------------------------------|-----------------------------------------------------------------|-------------------------------------------------------------------------------------|------------------------------------------------------------------|
|  | <b>One 12 oz<br/>can/bottle of<br/>beer</b> |  | <b>One 5 oz glass of<br/>regular (12%)<br/>wine</b> |  | <b>1 ½ oz of hard liquor<br/>(e.g. rum, vodka,<br/>whiskey)</b> |  | <b>1 mixed or straight<br/>drink with 1 ½ oz<br/>hard liquor</b> |
|-----------------------------------------------------------------------------------|---------------------------------------------|-----------------------------------------------------------------------------------|-----------------------------------------------------|-----------------------------------------------------------------------------------|-----------------------------------------------------------------|-------------------------------------------------------------------------------------|------------------------------------------------------------------|

**1 Standard Drink is Equal to**

**Carolina Alcohol Use Pattern Questionnaire**

1. During the last 12 months, how many alcoholic **drinks** did you have on a typical day when you drank alcohol? \_\_\_\_\_

2. During the last 12 months, how often did you have 5 or more **drinks** (4 or more if you are female) containing any kind of alcohol within a two-hour period? Please circle the correct response.

|       |           |           |            |                 |        |            |
|-------|-----------|-----------|------------|-----------------|--------|------------|
| Never | 1-3 times | 4-6 times | 7-12 times | 2-3 times/month | weekly | >once/week |
|-------|-----------|-----------|------------|-----------------|--------|------------|

3. At what age did you have your first alcoholic **drink**? \_\_\_\_\_

4. Before the age of 18, how often did you have 5 or more **drinks** (4 or more if you are female) containing any kind of alcohol within a two-hour period? Please circle the correct response.

|       |           |           |            |                 |        |            |
|-------|-----------|-----------|------------|-----------------|--------|------------|
| Never | 1-3 times | 4-6 times | 7-12 times | 2-3 times/month | weekly | >once/week |
|-------|-----------|-----------|------------|-----------------|--------|------------|

5. From age 18 to age 21, how often did you have 5 or more **drinks** (4 or more if you are female) containing any kind of alcohol within a two-hour period? Please circle the correct response.

|       |           |           |            |                 |        |            |
|-------|-----------|-----------|------------|-----------------|--------|------------|
| Never | 1-3 times | 4-6 times | 7-12 times | 2-3 times/month | weekly | >once/week |
|-------|-----------|-----------|------------|-----------------|--------|------------|

6. How old were you when you first drank 4 or more **drinks** in a row (females), or 5 or more **drinks** in a row (males)? \_\_\_\_\_

7. How old were you the first time you became drunk from alcohol? \_\_\_\_\_

**Supplemental Table 1. Approximated number of binge episodes based on responses to the CAUPQ.**

|                 | Before the age of 18 | From age 18 to age 21 |
|-----------------|----------------------|-----------------------|
| Never           | 0                    | 0                     |
| 1-3 times       | 2                    | 2                     |
| 4-6 times       | 5                    | 5                     |
| 7-12 times      | 9.5                  | 9.5                   |
| 2-3 times/month | 48                   | 48                    |
| weekly          | N/A                  | 156                   |
| >once/week      | N/A                  | 312                   |

### *Psychoactive medication use*

No participants reported ever taking psychotropic medications (“medications for your nerves or psychological medications”), aside from one who reported taking Xanax when flying (rare use). Ten participants reported having used over-the-counter cold medicines within the previous 3 months, and one also reported using an inhaler occasionally when needed, which should not have central effects, but might make them feel jittery. Use of such medications was not in the previous 24 hours and was generally one week or more before any sessions.

### *Behavioral Inventories*

Participants completed standardized questionnaires to capture demographic information, and to quantify factors that may account for individual differences in attentional bias to alcohol, sensitivity to reward conditioning, or brain connectivity. We quantified past and current drug and alcohol use with the Alcohol Use Questionnaire [AUQ; 3], the Carolina Alcohol Use Patterns Questionnaire (CAUPQ), the Drug Use Screening Inventory-Domain I [DUSI-I; 4], the Alcohol Use and Disorders Inventory Test [AUDIT; 5], and drinking motivations with Coopers Drinking Motivations Scale-Revised [DMQ-r; 6]. We used the NIAAA definition of binge drinking for males: 5 or more drinks in a 2-hour period (National Institute on Alcohol Abuse and Alcoholism, 2017). We also used a more refined measure of binge drinking, the AUQ binge drinking score (BDS), which is based on the speed of drinking, the frequency of intoxication in the past 6 months, and the percentage of time the individual becomes intoxicated when drinking, rather than a purely alcohol intake quantity measure [3]. The CAUPQ assesses the age of drinking onset, and the frequency of binge drinking. Binge drinking frequency was assessed in three questions on the CAUPQ, addressing binge drinking before age of 18, binge drinking between 18-21 years, and current binge drinking frequency. Responses range from “Never” to “More than once a week,” and are coded numerically from 0-

6 (see Appendix). To assess the effect of familial history of alcohol abuse we administered the Family Tree Questionnaire [7]. Impulsivity was measured by the Barrett Impulsivity Scale [BIS-11; 8].

Heavy binge drinkers differed significantly from moderate drinkers on several psychometric measures (Supplemental Table 2). Heavy drinkers reported higher rates of current (ADQ binge score) and adolescent binge drinking (between 0-21 years of age) and significantly more hazardous drinking behavior based on AUDIT scores. Heavy and moderate drinkers also differed significantly in their self-reported motivations to drink alcohol, based on the DMQ-r.

**Supplemental Table 2. Demographics and Alcohol Use Measures**

|                                      | MD ( <i>n</i> =19) | HD ( <i>n</i> =15) | <i>t</i> -statistic | <i>p</i> -value  |
|--------------------------------------|--------------------|--------------------|---------------------|------------------|
| <b><u>Demographics</u></b>           |                    |                    |                     |                  |
| Age (yrs)                            | 27±5.0             | 25.4±5.2           | -0.89               | 0.392            |
| Education (yrs)                      | 16.9±2.2           | 16.5±1.6           | -0.55               | 0.586            |
| Familial Alcohol Density (%)         | 12±15              | 18±18              | 1.02                | 0.317            |
| <b><u>Substance Use Measures</u></b> |                    |                    |                     |                  |
| Binge Score                          | 8.0±5.2            | 32.3±28.0          | 3.26                | <b>&lt;0.001</b> |
| Age of Drinking Onset (yrs)          | 15.9±3.3           | 15.8±3.3           | -0.071              | 0.994            |
| Binges 0-21 yrs [median (range)]     | 2 (0-360)          | 48 (0-312)         | 2.07                | <b>0.046</b>     |
| DMQ-r Social                         | 11.8±3.9           | 15.3±3.8           | 2.66                | <b>0.012</b>     |
| DMQ-r Enhancement                    | 10.1±4.2           | 14.0±3.5           | 2.98                | <b>0.005</b>     |
| DMQ-r Coping                         | 7.3±3.4            | 9.1±3.8            | 1.41                | 0.170            |
| DMQ-r Conformity                     | 7.5±3.9            | 7.5±2.2            | -0.07               | 0.995            |
| AUDIT                                | 4.1±2.7            | 12.6±3.7           | 7.55                | <b>&lt;0.001</b> |
| Barratt Impulsiveness Scale Total    | 57.0±9.5           | 61.2±8.7           | 1.36                | 0.184            |

### *Structural fMRI*

Structural brain images were obtained using the MP-RAGE sequence with FOV 256×256 mm<sup>2</sup>, 176 sagittal slices, 1 mm thick with 0.5 mm spacing, TR/TE=2530/2.3 ms, TI = 1100, echo spacing time 6.9 ms, flip angle 9°, bandwidth 190 Hz/pixel, total scan time 6 min and 3 sec. Parallel acquisition was conducted in the GRAPPA mode, with reference line phase encoding (PE)=32, and an acceleration factor of 2.

### *Dot-Probe Task*

We assessed selective attention capture using a dot-probe task consisting of 48 trials and implemented in E-Prime 2.0. Trials began with a non-predictive white fixation cross, followed by two grayscale images (11.1°×9.0°) that appeared simultaneously on either side of the fixation cross, for 150ms. Following a 50ms inter-stimulus interval (ISI), the target, a white asterisk (36 pt font), appeared in one of the image locations for 200ms. This timing structure yields a 200 ms stimulus-onset asynchrony (SOA) between the cue and target, well below the ~300 ms SOA at which attention capture effects decline [9]. In each trial, one image depicted alcohol-related content, while the other depicted neutral (kitchen-related) content. Alcohol and neutral images were otherwise similar in basic visual properties. Alcohol images appeared with equal frequency on the left and right in a pseudo-random order. Subjects were instructed to respond to the target's location via keypress as quickly as possible. Faster RT in trials with alcohol-cue congruent targets indicates AB toward alcohol-related cues via selective attention capture. This design is modified from our previous studies assessing AB toward smoking cues in cigarette smokers [10,11].

### *Modified Attentional Blink Task*

To measure extended attention hold, participants completed a modified attentional blink task [12,13] implemented in E-Prime 2.0 based on the emotional blink of attention paradigm [14-18]. The task included

four blocks of 48 trials each. Trials began with a non-predictive white fixation crosshair (18pt font), followed by a rapid serial visual presentation of 17 grayscale photos ( $11.1^\circ \times 9.0^\circ$ ) for 100 ms each, with a 0 ms ISI. Stimuli within each stream consisted of upright landscape or house photographs [12,13], except for two images: the critical distractor and the target stimulus. Critical distractor images were either a neutral or an alcohol-related image (ratio: 50:50). Targets occurred 2 or 8 images after the distractors and were house photos rotated  $90^\circ$  left or right. At the end of each trial, the response screen was presented for 2000 ms and participants were instructed to indicate the target orientation by pressing one of two keys in response to the query, “Was the target rotated right or left?” Reduced lag 2 accuracy relative to lag 8 accuracy indicates a greater attentional blink, and a greater blink following an alcohol distractor relative to neutral distractor is interpreted as greater AB to alcohol cues.

### *Reward Task*

We assessed each participant’s reward conditioning sensitivity using a value-driven attention capture task identical to one described elsewhere [19], programmed in Matlab (The MathWorks Inc., Natick, MA, 2000) using the Psychtoolbox-3 extensions [20]. Briefly, the task is separated into two phases: a reward-conditioning phase and a test phase. For the conditioning phase, target stimuli were red or green circles, and participants were rewarded for quickly and correctly reporting (via keypress) the orientation of a white bar (horizontal or vertical) appearing within the target circle. One of the two target colors yielded a reward of 10¢ in 80% of trials, and 2¢ in the remaining 20% of trials (high-reward target); these contingencies were reversed for the other color target (low-reward target). Incorrect or omitted responses yielded 0¢. The high-reward color was red for half the participants and green for the other half.

The test phase was structured similarly to the training phase, with key differences. First, the search array included a target shape (diamond or circle) among 5 non-target shapes (circles or diamonds); participants were instructed to disregard color, instead reporting the orientation of the bar within the target shape. Second, feedback after the search array only informed participants whether their response was

correct; no rewards were given. Critically, 25% of trials included a red circle in the search array, 25% included a green circle in the search array, and the remaining 50% lacked any reward-conditioned distractor shapes. Prolonged RTs in trials containing a distractor for which the color was previously associated with reward represent AB to reward-conditioned cues.

**Supplemental Table 3. Effects of P/T depletion on VTA whole-brain functional connectivity.**

|                                             | # Voxels | x   | y   | z   | <i>t</i> -statistic |
|---------------------------------------------|----------|-----|-----|-----|---------------------|
| L intraparietal sulcus                      | 118      | -36 | -74 | 36  | -6.01               |
|                                             | 48       | -34 | -46 | 36  | -5.81               |
|                                             | 12       | -42 | -56 | 54  | -4.72               |
| L orbitofrontal cortex and ventral striatum | 70       | -18 | 8   | -18 | -5.85               |
| L superior frontal sulcus                   | 42       | -26 | 18  | 52  | -5.53               |
|                                             | 30       | -20 | 32  | 30  | -5.05               |
|                                             | 27       | -28 | 64  | 12  | -5.04               |
|                                             | 7        | -22 | 58  | -4  | -4.71               |
|                                             | 2        | -28 | 52  | 0   | -4.59               |
|                                             | 2        | -16 | 20  | 60  | -4.34               |
| R superior frontal sulcus                   | 37       | 32  | 56  | 22  | -5.88               |
|                                             | 15       | 26  | 30  | 44  | -5.03               |
|                                             | 11       | 30  | 64  | 12  | -4.59               |
|                                             | 6        | 20  | 22  | 54  | -4.48               |
| L caudate tail                              | 31       | -22 | -18 | 22  | 4.95                |
| L postcentral gyrus                         | 30       | -8  | -42 | 72  | -5.54               |
| L inferior temporal gyrus                   | 26       | -44 | -18 | -28 | 5.43                |
| L superior temporal gyrus                   | 25       | -70 | -24 | -2  | -5.43               |
| cerebellar vermis                           | 24       | 6   | -62 | -16 | 5.01                |
|                                             | 5        | 0   | -46 | -22 | 4.74                |
| R middle cingulate gyrus                    | 23       | 6   | -32 | 32  | -5.39               |
| R intraparietal sulcus                      | 22       | 36  | -64 | 36  | -5.00               |
|                                             | 8        | 40  | -44 | 38  | -4.77               |
| R insula                                    | 16       | 32  | 2   | 14  | 5.83                |
| L precentral gyrus                          | 13       | -12 | -28 | 76  | -5.30               |
| L middle temporal gyrus                     | 5        | -42 | 10  | -32 | 5.37                |
| L brainstem                                 | 5        | -4  | -26 | -16 | 4.69                |
| R brainstem                                 | 4        | 8   | -26 | -10 | 4.81                |
|                                             | 2        | 6   | -26 | -16 | 4.34                |
| L precentral gyrus                          | 4        | -52 | -4  | 50  | -4.44               |
| R superior temporal gyrus                   | 3        | 66  | -6  | -4  | -4.75               |
| R ventral striatum                          | 2        | 8   | 6   | -12 | -4.39               |

## REFERENCES

- 1 Kelm MK, Boettiger CA. Effects of acute dopamine precursor depletion on immediate reward selection bias and working memory depend on catechol-O-methyltransferase genotype. *Journal of cognitive neuroscience*. 2013;25(12):2061-71.
- 2 Montgomery AJ, McTavish SF, Cowen PJ, Grasby PM. Reduction of brain dopamine concentration with dietary tyrosine plus phenylalanine depletion: an [<sup>11</sup>C]raclopride PET study. *The American journal of psychiatry*. 2003;160(10):1887-9.
- 3 Townshend JM, Duka T. Patterns of alcohol drinking in a population of young social drinkers: a comparison of questionnaire and diary measures. *Alcohol and alcoholism (Oxford, Oxfordshire)*. 2002;37(2):187-92.
- 4 Tarter RE. Evaluation and treatment of adolescent substance abuse: a decision tree method. *The American journal of drug and alcohol abuse*. 1990;16(1-2):1-46.
- 5 Saunders JB, Aasland OG, Babor TF, de la Fuente JR, Grant M. Development of the Alcohol Use Disorders Identification Test (AUDIT): WHO Collaborative Project on Early Detection of Persons with Harmful Alcohol Consumption--II. *Addiction (Abingdon, England)*. 1993;88(6):791-804.
- 6 Cooper ML. Motivations for alcohol use among adolescents: Development and validation of a four-factor model. *Psychological assessment*. 1994;6(2):117-28.
- 7 Mann RE, Sobell LC, Sobell MB, Pavan D. Reliability of a family tree questionnaire for assessing family history of alcohol problems. *Drug and alcohol dependence*. 1985;15(1-2):61-7.
- 8 Barratt ES. Impulsiveness and aggression. *Violence and mental disorder: Developments in risk assessment*. Chicago: University of Chicago Press; 1994. p. 61-79.
- 9 Posner M, Cohen Y. Components of visual orienting. In: H. Bouma and D. Bouwhuis (Eds.). *Attent Perform* 1984;vol. X Erlbaum Associates, Hillsdale, NJ:531–56.
- 10 Chanon VW, Sours CR, Boettiger CA. Attentional bias toward cigarette cues in active smokers. *Psychopharmacology*. 2010;212(3):309-20.
- 11 Multivariate pattern analysis of the neural correlates of smoking cue attentional bias. *Pharmacol Biochem Behav*. 2019;180:1-10.(doi):10.1016/j.pbb.2019.03.001. Epub 19 Mar 5.
- 12 Wais PE, Rubens MT, Boccanfuso J, Gazzaley A. Neural mechanisms underlying the impact of visual distraction on retrieval of long-term memory. *J Neurosci*. 2010;30(25):8541-50.
- 13 Anderson AK, Wais PE, Gabrieli JD. Emotion enhances remembrance of neutral events past. *Proceedings of the National Academy of Sciences of the United States of America*. 2006;103(5):1599-604.
- 14 Most SB, Laurenceau JP, Graber E, Belcher A, Smith CV. Blind Jealousy? Romantic Insecurity Increases Emotion-Induced Failures of Visual Perception. *Emotion*. 2010;10(2):250-56.
- 15 Most SB, Smith SD, Cooter AB, Levy BN, Zald DH. The naked truth: Positive, arousing distractors impair rapid target perception. *Cognition & Emotion*. 2007;21(5):964-81.
- 16 Most SB, Chun MM, Widders DM, Zald DH. 654-61 (*Psychonomic Soc Inc*, 2005).
- 17 Kennedy BL, Most SB. Perceptual, not memorial, disruption underlies emotion-induced blindness. *Emotion*. 2012;12(2):199-202.
- 18 Most SB. Setting sights higher: category-level attentional set modulates sustained inattentive blindness. *Psychological research*. 2011.
- 19 Anderson BA, Faulkner ML, Rilee JJ, Yantis S, Marvel CL. Attentional bias for nondrug reward is magnified in addiction. *Experimental and clinical psychopharmacology*. 2013;21(6):499-506.
- 20 Brainard DH. The psychophysics toolbox. *Spatial vision*. 1997;10:433-36.
